# Supplementary material
Source: PubMed Central journal article supplement (PMC4528248)
Supplement: supp_M114.044628_mcp.M114.044628-1.pdf [file supp_M114.044628_mcp.M114.044628-1.pdf]

# Cysteine cathepsins shed cell adhesion proteins and receptors from the surface of cancer cells

**Authors:** Barbara Sobotič<sup>1,2</sup>, Matej Vizovišek<sup>1,2</sup>, Robert Vidmar<sup>1,2</sup>, Petra Van Damme<sup>3,4</sup>, Vasilena Gocheva<sup>5</sup>, Johanna A. Joyce<sup>5</sup>, Kris Gevaert<sup>3,4</sup>, Vito Turk<sup>1,2,6</sup>, Boris Turk<sup>1,6,7,8\*</sup>, Marko Fonovič<sup>1,6\*</sup>

## **Affiliations:**

<sup>1</sup> Department of Biochemistry, Molecular and Structural Biology, Jozef Stefan Institute, Jamova cesta 39, SI-1000 Ljubljana, Slovenia

<sup>2</sup> International Postgraduate School Jozef Stefan, Jamova 39, SI-1000 Ljubljana, Slovenia

<sup>3</sup> Department of Biochemistry, Ghent University, B-9000 Ghent, Belgium

<sup>4</sup> Department of Medical Protein Research, VIB, B-9000 Ghent, Belgium

<sup>5</sup> Cancer Biology and Genetics Program, Memorial Sloan Kettering Cancer Center, New York, NY 10065, USA

<sup>6</sup> Centre of Excellence for Integrated Approaches in Chemistry and Biology of Proteins, Jamova cesta 39, SI-1000 Ljubljana, Slovenia

<sup>7</sup> Center of Excellence NIN, Ljubljana, Slovenia

<sup>8</sup> Faculty of Chemistry and Chemical Technology, University of Ljubljana, Slovenia

## SUPPLEMENTARY FIGURES

### Supplemental Figure S1

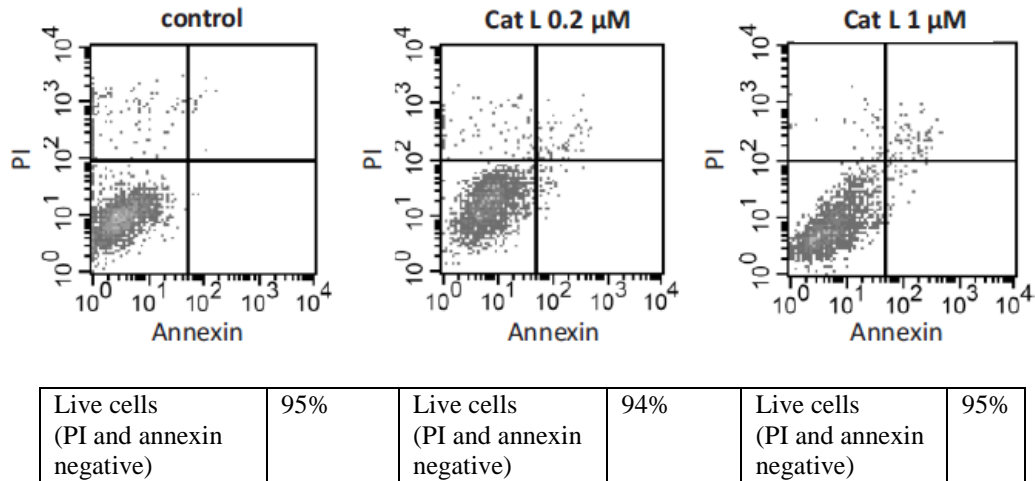

### Supplemental Figure S1. Viability of MDA-MB-231 cancer cell line after cathepsin treatment.

Intact cells were treated for one hour with cathepsin L (1 μM, 0.2 μM) in PBS (pH 6.0, 0.5 mM DTT) or inhibited cathepsin L (with 20 μM E-64) as a negative control. Live cells after the treatment are shown as PI and Annexin negative cells. No significant difference in viability was observed between the control and the cathepsin treated cells.

## Supplemental Figure S2

### activated leukocyte cell adhesion molecule (ALCAM) (*isoform 1*)

MESKGASSCRLFLCLISATVFRPGLGWYTVNSAYGDTIIPCRLDVQPQLMFGKWKYEKPDGSPVFIAR  
RSSTKKSQYDDVPEYKDRNLNSENYSNARISDEKRFVCMVTEDNVFEAPTIVKVFQPSKPEIV  
SKALFLETEQLKKGDCISEDSYPDGNITWYRNGKVLHPLEGAVVIIFFKEMDPVTQLYTMSTLEYKT  
TKADIQMPFTCSVTYYGPGSQKTIHSEQAVFDIYYPTQVVIQVLPKNAIKEGDNITLCKLNGNPPPEE  
FLFYLPQPEGIRSSNTYTLTDVRRNATGDYKCSLIDKKSMAITVHYLDLSLNPSGEVTRQIGDALP  
VSCTISASRNATVWVWMDNIRLRSSPSFSSLHYQDAGNYVCETALQVEGLKKRESLTLIVEGKPKIKM  
TKKTDPSGLSKTIICHVEGFPAIQWTTGSGSVINQTEESPYINGRYYSKIIISPEENVTLTCTAENQLER  
TVNSLNVSAISIPEHDEADEISDENREKVNDQAKLIVGIVVGLLLAALVAGVVYWLYMKKSKTASHVNV  
KDLGNMEENKKLEENNHKTEA

### alkaline phosphodiesterase 1

MERDGCAGGSRGGEGGRAPREGPAGNGRDRGRSHAAEAPGDPQAAASLLAPMDVGEEPLEKAARA  
RTAKDPNTYKVLSLVLSVCVLTTLGCIFGLKPSCAKEVKCKGRCFERTFGNCRDAACVELGNCCLD  
YQETCIEPEHIWTCNKFRCGEKRLTRSLCACSDCKDKGDCCINYSVCQGEKSWVEEPCESINEPQCPA  
GFETPPTLLFSLDGFRAEYLHTWGGLLPVISKLKKCGTYTKNMRPVYPTKTFPNHYSIVTGLYPESHGIID  
NKMYDPKMNASFSLKSKKEFNPEWYKGEPIVVTAKYQGLKSGTFFWPGSDVEINGIFPDIYKMYNGSV  
PFEERILAVLQWLQPKDERPHFYTYLEEPDSSGHSYGPVSSEVIKALQRVDGMVGMMDGLKELNL  
HRCLNLILISDHGMEQGSCKYIYLNKYLGDVKNIKVIYGAARLRPSDVPDKYYSFNIEGIARNLSCRE  
PNQHFKPYLKHFLPKRLHFAKSDRIEPLTFYLDPQWQALALNPSEKCYCGSGFHGSDNVFSNMQALFVG  
YGPFGKHGIEADTFENIEVYNLMCDLLNLTPAPNNGTHGSLNHLKPNVYTPKHPKEVHPLVQCPFTRN  
PRDNLGCSCNPSILPIEDFQTFNLTVAEEKIHKETLPYGRPVLQKENTICLLSQHQFMSGYSQDILMPL  
WTSYTVDRNDSFSTEDFSNCLYQDFRIPLSPVHKCSFYKNNTKVSYGFLSPPQLNKNSSGIYSEALLTTNI  
VPMYQSFQVIWRVYFHDTLRKYAEERNVNVVSGPVDFDYDGRCDSENLRQKRRVIRNQEILPHTH  
FIVLTSCKDTSQTPLHCENLDTLAFILPHRTDNSESCVHGKHDSSWVEELLMLHRARITDVEHITGLSFY  
QQRKEPVS DILKLTHTLPTFSQED

### CD44 antigen (CD44) (*isoform 1*)

QIDLNITCRFAGVFHVEKNGRYSISRTEAADLCKAFNSTLPTMAQMEKALSIGFETCRYGFIEGHVVIPRI  
HPNSICAANNTGVYILTSNTSQYDTCFNASAPPEEDCTSVTDLPNAFDGPITITIVNRDGRYVQKGEY  
RTNPEDIYPSNPTDDDVSNGSSSSTSGGYIFYTFSTVHPIPEDSDSPWITDSTRIPATLMTSATATET  
ATKRQETWDWFSWFLPSESKNHLHTTTQMAGTSSNTISAGWEPNEENEDERDRHLSFSGSIDDDEDF  
ISSTISTTPRAFDHTKQNPQDWTQWNPNSHNPEVLLQTTTRMTDVRNGTTAYEGNWNPEAHPPLIHHEH  
HEEEETPHSTSTIQATPSSTTEETATQKEQWFGNRWHEGYRQTPKEDSHSTTGTAASAHTSHPMQGR  
TPSPEDSSWTDFFNPISHPMGRGHQAGRRMDMDSSHSITLQPTANPNTGLVEDLDRTPGLSMTTQGSNS  
QSFSSTHEGLEEDKDHPPTSTLTSSNRNDVTGRRDPNHSEGSTTLLEGYTSHPHTKESRTFIPVTS  
AKTGSFGVTA VTVGDSNSNVNRSLSGDQDTFHPSGGSHHTHGESDGHSHGSQEGGANTTSGPIRTPQIPE  
W  
LILASLLALALILAVCIAVNSRRRCGQKKLVINSNGGAVEDRKPSGLNGEASKSQEMVHLVNKESSET  
PDQFMTADETRNLQNVDMKIGV

### cell surface glycoprotein MUC 18

VPGEAEQPAPELVEVEVGSTALLKCGLSQSQGNLSHVDWFSVHKEKRTLIFRVRQGGQSEPGEYEQR  
LSLQDRGATLALTQVTPQDERIFLCQGKRPRSQEYRIQLRVYKAPPEPNIQVNPLGIPVNSKEPEEVATC  
VGRNGYPIPVVIWYKNGRPLKEEKNRVHIQSSQTVESSGLYTLQSILKAQLVKEDKDAQFYCELNYRPL  
SGNHMKESREVTVPVFYPTKEVWLEVEPVGMLKEGDRVEIRCLADGNPPPFSISKQNPSTREAEETT  
NDNGVLVLEPARKEHSGRYECQGLDLDTMISLLSEPQELLVNYVSDVRVSPAAPERQEGSSLTLTCEAE  
SSQDLEFQWLREETGQVLERGPVLQLHDLKREAGGGYRCVASVPSIPGLNRTQLVNVAFGPPWMAFK  
ERKVVVKENMVLNLSCEASGHPRPTISWVNGTASEQDQDPQVLSLTLNVLVTPELLETVECTASND  
LGKNTSILFLELVNLTTLTPDSNTTGLSTSTASPHTRANSTSTERKLPPEPESRGVVIVAVIVCIVLAVLG  
AVLYFLYKKGKLCRRSGKQEITLPPSRKSELVVEVKS DKLPEEMGLLQGS S GDKRAPGDQGEKYIDLR  
H

**decay-accelerating factor CD55 (isoform 2)**

MTVARPSVPAALPLLGELPRLLLLVLLCLPAVWGDCLPPDPVNAQPALEGRTSFPEDTVITYKCEESFV  
KIPGEKDSVICLKGQWSDIEEFCNRSCEVPTRLNSASLKQPYITQNYFPVGTVVEYECRPGYRREPSLSP  
KLTLCLQNLKWSTRAVEFCKKKSCPNPGEIRNGQIDVPGGILFGATISFSCNTGYKLFGSTSSFCFLISGSSVQ  
WSDPLPECREIYCPAPPQIDNGHIIQGERDHYGYRQSVTYACNKGFTMIGEHSIYCTVNNDEGEWSGPPPE  
CRGKSLTSKVPPTVQKPTTVNVPTTEVSPTSQKTTTTKTTTPNAQATRSTPVSRTTKHFHETTPNKGS GTT  
S GTTRLLSGHTCFTLTGLLGLVTMGLLT

**epidermal growth factor receptor**

LEEKKVCQGTSNKLTLQGLTFEDHFLSLQRMFNNCEVVLGNLEITYVQRNYDLSFLKTIQE VAGYVLIAL  
NTVERIPLLENLQIRGNMYYENSYALAVLSNYDANKTGLKELPMRNLQEILHGAVRFSNNPALCNVESI  
QWRDIVSSDFLSNMSMDFQNLHGSCQKCDPSPNGSCW GAGEENCQKLTKIICAQQCSGRCRGKSPSD  
CCHNQCAAGCTGPRESDECLVCRKFRDEATCKDTCPLMLYNPTYQMDVNPEGKYSFGATCVKKCPR  
NYVVTDHGSCVRACGADSYEMEEDGVRKCKKCEGPCRKVCNGIGIGEFKDSLSINATNIKHFKNCT SIS  
GDLHILPVAFRGDSFHTHTPPLDPQELDILKT VKEITGFLLIQAWPENRTDLHAFENLEIIRGRTKQH GQFSL  
AVVSLNITSLGLRSLKEISDGDVVISGNKNCYANTINWKKLFGTSGQKTKIISNRGENSCKATGQVCHA  
LCSPEGCWGPEPRDCVSCRNVSRGRCVDKCNLLEGEPRFVENSECIQCHPECLPQAMNITCTGRGPD  
NCIQCAHYIDGPHCVKTCPAGVMGENNTLVWKYADAGHVCHLCHPNCTYGCTGPGLEGCPNTPKIP  
SIATGMV GALLLLLVVALGIGLFMRRRHIVRKRTRLRLLQERELVEPLTPSGEAPNQALLRILKETEFKKI  
KVLGSGAFGTVYKGLWIPEGEKV KIPVAIKELREATSPKANKEILDEAYVMASVDNPHVCRLLGICLTS  
TVQLITQLMPFGCLLDYVREHKDNIGSQYLLNWCVQIAKGMNYLED RRLVHRDLAARNVLVKTPQH V  
KITDFGLAKLLGAEKEYHAEGGK VPIKWMALESILHRIYTHQSDVWSYGVTVWELMTFGSKPYDGI P  
ASEISSILEKGERLPQPICTIDVYMIMVKCWMIDADSRPKFRELIEFSKMARDPQRYLVIQGDERMHLP  
SPTDSNFYRALMDEEDMDDVVD ADEYLIPQQGFFSPTSRTPLLSLSATSNNSTVACIDRNLGQSCPIK  
EDSFLQRYSSDPTGALTEDSIDDTFLPVPEYINQSVPKRPAQSVQNPVYHNQPLNPAPSRDPHYQDPHST  
AVGNPEYLN TVQPTCVNSTFDSPA HWAQKGS HQISLDNPDYQQDFFPKAKPNGIFKGSTAENAEYLR  
VAPQSSEFIGA

**ephrin type A receptor 2**

QGKEVLLDFAAAGGELGWLTHPYGKGWDLMQNIMNDMPIYMYSV CNVMSGDQDNWLRTN WVVYR  
GEAERIFIELKFTVRDCNSFPGGASSCKETFNLYAESDLDYGTNFQKRLFTKIDTIAPDEITVSSDFEARH  
VKLNVEERSVGPLTRKGFYLA FQDIGACVALLSVRVYKCKPELLQGLAHFPETIAGSDAPSLATVAGT  
CVDHAVVPPGGEEP MHC AVDGEWL VPIGQCLCQAGYEKVEDACQACSPGFFKFEASESPCLECEPHT  
LPSPEGATSC ECEEGFFRAPQDPASMPCTRPPSAPHYLTAVGMGAKVELRWTPPQDSGGREDIVYSVTC  
EQCWPESGECGPCEASVRYSEPPHGLTRTSVTVSDLEPHMNYTFTVEARNGV SGLVTSRSFR TASVSIN  
QTEPPKVRLEGRSTTSLSVSW SIPPQQSRVWKYEV TYRKKGDSNSYNVRRTEGFSVTLDDLAPDTTYL  
VQVQALTQEGQAGSKVHEFQTLSP EGSGLAVIGGVA VGVVLLLVLAVGVFFI HRRRKNQRARQSPE  
DVYFSKSEQLKPLKTYVDPHTYEDPNQAVLKFTTEIHPSCVTRQKVIGAGEFGEVYK GMLKTS SSGKKEV  
PVAIKTLKAGYTEKQRVDFLGEAGIMGQFSHHNIIRLEGVISKYKPMMIITEY MENGALDKFLREKDG EF  
SVLQLVGMRLGIAAGMKYLANMNYVHRDLAARNILVNSNLVCKVSD FGLSRVLEDDPEATYTTSGGK  
IPIRWTAPEAISYRKFTSASDVWSFGIVMWEVMTYGERPYWELSNHEVMKAINDGFR LPTPMDCPSAIY  
QLMMQCWQQERARRPKFADIVSILDKLIRAPDSLKTLADFDPRVSIRLPSTSGSEGV PFRTVSEWLESIK  
MQQYTEHFMAAGYTAIEKV VQMTNDDIKRIGVRLPGHQKRIAYSLGLKDVNTVGIPI

**L1 cell adhesion molecule (L1CAM) (isoform 1)**

IQIPEEYEGHHVMEPPVITEQSPRRLVVFPTDDISLKCEASGKPEVQFRWTRDGVVHF KPKEELGVTVYQS  
PHSGSFTITGNNSNFAQRFQGIYRCFASNKLG TAMSHEIRLMAEGAPKWPKETVKPVEVEEGESVVLPC  
NPPPSAEPLRIYWMNSKILHIKQDERVTMGQNGNLYFANVLTSDNHSDYICHAHFPGTRTIIQKEPIDLR  
VKATNSMIDRKPRLLFPTNSSSHLV ALQGQPLVLECIAEGFPPTTIKWLRPSGMPADRVTYQNHNTL  
QLLKVGEEDDGEYRCLAENSLG SARHAYYVTEAAPYWLHKPQSHLYGPGETARLDCQVQGRPQPEV  
TWRINGIPVEELAKDQKYRIQRGALILSNVQPSDTMVTQCEARNRHG LLLANAYIYVVQLPAKILTADN  
QTYMAVQGSTAYLLCKAFGAPVPSVQWLDDEDGTTVLQDERFFPYANGTLGIRD LQANDTGRYFCLAA  
NDQNNVTIMANLKVKDATQITQGRSTIEKKGSRVTF TCQASFDPQLQPSITWRGDGRDLQELGDS DKY  
FIEDGRLVIHSLDYSDQGNYS CVASTELDVVESRAQLLVVGGSPGPV PRLVLSDLHLLTQSQVRVSWSPA

EDHNAPIEKYDIEFEDKEMAPEK WYSLGKVPGNQSTTLKLSPLYVHYTFRVTAINKYGPGEPSVSETV  
VTPEAAPEKNPVDVKGEGNETTNMVITWKPLRWMDWNAPQVQYRVQWRPQGRGPWQEIVSDPFL  
VVSNTSTFVPEIKVQAVNSQGKGPEPQVTIGYSGEDYPQAIPELEGIEILNSSAVLVKWRPVDLAQVKG  
HLRGYNVTYWREGSQRKHSKRHIHKDHVVVPANTTSVILSGLRPYSSYHLEVQAFNGRGS GPASEFTFS  
TPEGVPGHPEALHLECSNTSLLLRWQPPLSHNGVLTGYVLSYHPLDEGGKQLSFNLRDPELRTHNLT  
DLSPHLR YRFQLQATTKEGPGEAIVREGGTMALSGISDF **GNISATAGENYSVVSWPKEGOCNFRFHILF**  
**KALGEEKGGASLSPQYVSYNQSSYTQWDLQPDTDYIEHLFKERMFRHQMAVKTNGTGRVRLPPAGFA**  
**TE**

### nectin-like protein 5

WPPPGTGDVVVQAPTQVPGFLGDSVTLPCYLQVPNMEVTHVSQLTWARHGESGSMVAFHQTQGPSYS  
ESKRLEFVAARLGAELRNASLRMFLRVEDEGNYTCLFVTFPQGSRSVDIWLRLVAKPQNTAEVQKVQ  
LTGEPVPMARCVSTGGRPPAQITWHSDLGMPNTSQVPGFLSGT VTVTSLWILVPSSQVDGKNVTCKV  
EHESFEKPQLLTVNLT VYYPPEVSISGYDNNWYLGQNEATLTCDARSNPEPTGYNWSTTMGPLPPFAVA  
QGAQLLRPVDKPIINTL LICNVTNALGARQAE LTVQVKEGPPSEHSGISRN **AIIFLVLGILVFLILG**  
**IGIIFYWSKCSREVLWHCHLCPSTEHASASANGHVSYS AVSRENSSSQDPQTEGTR**

### neuropilin 1

FRNDKCGDTIKIESPGYLTSPGYPHSYHPSEKCEWLIQAPDPYQRIMINFNPHFDLEDRDCKYDYVEVFD  
GENENGHFRGKFCGKIAPPVSSGPF LFIKFVSDYETHGAGFSIRYEIFKRGPECSQNYTTPSGVIKSPGF  
PEKYPNSELECTYIVFVPKMSEIILEFESFDLEPDSNPPGGMFCRYDRLEIWDGFPDVGPHIGRYCGQKTPG  
RIRSSSGILSMVYFYTDSAIAKEGFSANYSVLQSSVSEDFKCM EALGMESGEIHSQITASSQYSTNWSAER  
SRLNYPENGWTPGEDSYREWIQVDLGLLRVFAVGTQGAISKETKKKYVVKTYKIDVSSNGEDWITIKE  
GNKPVLFGQNTNPTD VVVAVFPKPLITRFVRIK PATWETGISMRFEVY GCKITDYPCSGMLGMVSGLIS  
DSQITSSNQGDRNWPENIRLVTSRSGWALPPAPHSYINEWLQIDLGEEKIVRGIIIQGGKHRENKVFMR  
KFKIGYSNNGSDWKMIMDDSKRKAKSFEGNNNYDTPELRTFPALSTRFIRIYPERATHGGLGLRMELLG  
CEVEAPTAGPTTPNGNLVDECDDDQANCHSGTGDDFQLTGGTTVLATEKPTVIDSTIQSEFPTYGFNCEF  
GWGSHKTFCHWEHDNHVQLKWSVLT SKTGPIQDHTGDGNFIYSQADENQKGVARLVSPVVYSQNSA  
HCMTFWYHMSGSHVGTLRVKLR YQKPEEYDQLVWMAIGHQGDHWKEGRVLLHKS LKLYQVIFEGEI  
GKGNLGGIAVDDISINNHISQEDCAKPADLDKKNPEIKIDETGSTPGYE GEGEGDKNISRKPGNVLKTLD  
**PLITIAMSALGVLLGAVCGVLYCACWHNGMSERNLSALENYNFELVDGVKLKDKLNTQSTYSEA**

### plexin A1

EAGLPRAGGGSQPPFRTFSASDWGLTHLVVHEQTGEVYV GAVNRIYKLSGNLTLRAHVTGPVEDNEK  
CYPPPSVQSCPHGLGSTDNVNKL LLLLDY AANRLLACGSASQGICQFLRLD DFLKLGEPHHRKEHYLSSV  
QEAGSMAGVLIAGPPGQQA KLFVGT PIDGKSEYFPTLSSRRLMANEEDADMFGFVYQDEFVSSQLKIP  
SDTLSKFPAFDIYYVYSFRSEQFVYYLTLQLDTQLTSPDAAGEHFFTSKIVRLCVDDPKFYSYVEFPICGE  
QAGVEYRLVQDAYLSRPGRALAHQLGLAEDEDVLFVFAQQQKNRVKPPKESALCLFTLR AIKEKIKE  
RIQSCYRGEGKLSPLWLLNKELGCINSPLQIDDDFCGQDFNQPLGGTVTIEGTPLFVDKDDGLTAVAA Y  
DYRGRTVVFAGTRSGRIRKILVDLSNPGGRPALAYESVVAQEGSPILRDLVLSPNHQYLYAMTEKQVTR  
VPVESCQYTSCELCGSRDPHCGWCVLHSICSRRDACERADEPQRFAADLLQCVQLTVQPRNVSVTM  
SQVPLVLQAWNVPDLSAGVNC SFEDFTESES VLEDGRIHCRSPSAREVAPITRGQGDQRVVKLYLKSKE  
TGKKFASVDFVFNCSVHQSLSCVNGSFCHWCKYRHVCTHNVADCAFLEGRVNVSEDCPQILPSTQI  
YVPVGVVKPITLAARNLPQPQSGQRYECLFHIPGSPARVTALRFNSSSLQCQNSSYSYEGNDVSDLPVN  
LSVVWNGNFVIDNPQNIQAHL YKCPALRESCGLCLKADPRFECGWCV AERRCSLRHHC AADTPASWM  
HARHGSSRCTDPKILKLSPETGPRQGGTRLTITGENLGLRFEDVRLGVRVGVKVL CSPVESEYISAEQIVCE  
IGDASSVRAHDALVEVCVRDCSPHYRALSPKRFTFVTPTFYRVSPSRGPLSGGTWIGIEGSHLNAGSDVA  
VSVGGRPCSF SWRNSREIRCLTPPGQSPGSAPIIINRAQLTNPEVKYNYTEDPTILRIDPEWSINSGGTL  
TVTGTNLATVREPRIRAKYGGIERENGCLVYNDTTMVCRAPSVANPVRSPPELGERPDELGFVMDNVR  
SLLVLNSTSFLYYPDPVLEPLSPTG LLELKPSPLILKGRNLLPPAPGNSRLNYTVLIGSTPCTLT VSETQLL  
CEAPNLTGQHKVTVRAGGF EFSPGTLQVYSDSLLTPLYAKDIPNYKSWVERYADI AKMPAISDQDM  
SAYLAEQSRLHLSQFNMSALHEIYSITKYKDEILA ALEKDEQARRQLR SKLEQVVDTMALSS **AIVGI**  
**GGGGLLLLVIVAVLIAYKRKSRDADRTLKRLQLQMDNLESVALECKEAFELQTDIHELTDNDLGA**  
**GIPFLDYRTYAMRVLFPGIEDHPVLKEME VQANVEKSLTLFGQLLTKKHFLTFIRTLEAQRSFSMRDRG**  
**NV ASLIMTALQGEMEYATGV LKQLLSDLIEKNLESKNHPKLLLRRTESVAEKMLTNWFTFLLYKFLKE**  
**CAGEPLFMLYCAIKQQMEKGPIDAITGEARYLS SEDKLIRQQIDYKTLTLNCVNPENENAPEVPVKGLD**

CDTVTQAKEKLLDAAAYKGVPSQRPKAADMDLEWRQGRMARIILQDEDVTTKIDNDWKRLNLAHY  
QVTDGSSVALVPKQTSAYNISNSSTFTKSLSRYESMLRTASSPDSLRSRTPMITPDLESGLKLVKHN  
DHLDQREGDRGSKMVSEIYLTRLLATKGTQKFVDDL FETIFSTAHRSALPLAIKYMFDLDEQADKH  
QIHDADVRHTWKSACLPLRFVNVVKNPQFVFDIHKNSITDACLSVVAQTFMDSCTSEHKLKGDSPSN  
KLLYAKDIPNYKSWVERYYADIAKMPAISDQDMSAYLAEQSRHLHSQFNMSALHEIYSYITKYKDEIL  
AALEKDEQARRQLRSKLEQVVDTMALSS

### plexin B2

LRPRKLDFFRSEKELNHLAVDEASGVVYLGAVNALYQLDAKLQLEQQVATGPALDNKKCTPPIEASQC  
HEAEMTDNVNQLLLDPPRKRLVECGSLFKGICALRALSINSLRFLYEDGSGEKS FVASNDEGVATVGL  
VSSTGPGDRVLFVKGNGPHDNGIIVSTRLLDRTDSREAFEAYTDHATYKAGYLSTNTQQFVA AFED  
GPYVFFVFNQDKHPARNRLLARMCREDPNYYSYLEMDLQCRDPDIHAAAFGTCLAASVAAPGSGR  
VLYAVFSRDRSSGGPGAGLCLFPLDKVHAKMEANRNACYTGTREARDIFYKPFHGD IQCGGHAPGSS  
KSFPCGSEHLPYPLGSRDGLRGTAVLQRGGLNLTAVTVAAENNHTVAFLGTS DGRILKVYLTPDGTSSE  
YDSILVEINKRVKRDVLVSGDLGSLYAMTQDKVFRLPVQECLSYPTCTQCRDSQDPYCGWCVVEGRCT  
RKAECPRAEESHWLWSRSKSCVAVTSAQPQNMSRRAQGEVQLTVSPLPALSEEDEL LCLFGESPPHPA  
RVEGEAVICNSPSSIPVTPPGQDHVAVTIQLLLRRGNIFLTSYQYPFYDCRQAMSLEENLPCISCVSNRWT  
CQWDLRYHECREASPNPEDGIVRAHMEDSCPQLGPSPLVIPMNHETDVNFQGNLDTVKGSSLHVGS  
DLLKFMEPVMTQESGTFARTPKLSHDANETLPLHLVYKSYGKNIDSKLHVTLYNCSFGRSDCSLCRAA  
NPDYRCAWCGGQSRCVYEALCNTTSECPPPITRIQPETGPLGGIRITILGSLN LGVQAGDIQRISVAGR  
CSFQPERYSVSTRIVCVIEAAETPFTGGVEVDVFGKLRSPNVQFTFQQPKPLSVEPQQGPQAGGTTTI  
HGTHLDTGSQEDVRVTLNGVPCKVTKFGAQLQCVTGPQATRGM LLEVS YGGSPVPNPGIFFTYREN  
VLRAFEPLRSFASGGRSINVTGQGFSLIQRFAMVVIAEPLQSWQPPREAESLQPM TVVGTDYVFHNDTK  
VVFLSPAVPEEPEAYNLTVLIEMDGHRA LLRTEAGAFEYVPDPTFENFTGGVKKQVNKLIHARGTNLNK  
AMTLQEAFAFVGAERCTMKTLTETDLYCEPPEVQPPPKRRQKRDTTHNLPEFIVKFGSREWV LGRVEY  
DTRVSDVP *LSLILPLVIVPMVVVIAVSVYCYWRKSQQAEREYEKIKSQLEGLEESVRDRCKKEFTDLME*  
*MEDQTNVDHEAGIPVLDYKTYTDRVFLPSKDGDKDVMITGKLDIPEPRRPVVEQALYQFSNLLNSKSF*  
*LINFHTLENQREFSARAKVYFASLLTVALHGKLEYTDMHTLFLELLEQYVVAKNPKLMLRRSETTV*  
*ERMLSNWMSICLYQYLKDSAGEPLYKLFKAIKHQVEKGPVDAVQKAKYTLNDTGLLGDDVEYAPL*  
*VSVIVQDEGVDAIPVKVLNCDTISQVKEKIIDQVYR*

### transferrin receptor protein 1

MMDQARSAFSNLFGGEPLSYTRFSLARQVDGDNHSHVEMKLA VDEEENADNNTKANVTKPKRCSGSIC  
*YGTIAVIVFFLIGFMIGLYG*CKGVEPKTECERLAGTESPVREEPGEDFPAARRLYWDDLKRK LSEKLD  
TDFTGTIKLLNENSYPREAGSQKDENLALYVENQFREFKLSKVWRDQH FVKIQVKDSAQNSV IIVDKN  
GRLVYLVENPGGYVA YSKAATVTGKLVHANFGTKKDFEDLYTPVNGSIVIVRAGKITFAEKVANAESL  
NAIGVLIYMDQTKFPIVNAEL SFFGHAHLGTGDPYTPGFPSFNHTQFP SRSSGLPNIPVQTISR AAEKLF  
GNMEGDCPSDWKTDSTCRMV TSESKNVKLTVSNVLKEIKILNIFGVIKGFVEPDHYVVVGAQRDAWGP  
GAAKSGVGTALLKLAQMFSDMVLK DGFQPSRSIIFASWSAGDFG SVGATEWLEGY LSSLHLKAFTYIN  
LDKAVLGTSNFKVSASPLLYT LIEKTMQNVKHPVTGQFLYQDSNWASKVEKLTLDNAAFPFLAYSGIPA  
VSFCFCEDTDYPYLGTTMDTYKELIERIPELNKVARAAA EVAGQFVIKLT HDVELNLDYER YNSQLLSF  
VRDLNQYRADIKEMGLSLQWLYSARGDFFRATSRLTTDFGNAEK TDRFVMKKLNDRVMRVEYHFLSP  
YVSPKESPFRHVFWGSHTLPALLENLKL RKQNNGAFNETLFRNQLALATWTIQGAANALSGDVWDI  
DNEF

### Supplemental Figure S2. Amino acid coverage of identified substrate ectodomains

The amino acid sequences of all identified shed extracellular domains are shown. Extracellular domains are marked in black, while cytosolic regions are red. Transmembrane regions are underlined and in italics. Peptides which were identified by mass spectrometry are shaded. For each substrate, multiple peptides were identified and they were all located exclusively in the substrate ectodomain, whereas none of the identified peptides were located in transmembrane or cytosolic domains. In the case of CD55, which is a GPI anchored protein, the amino acid containing the GPI anchor is marked in red.

### Supplemental Figure S3

A)

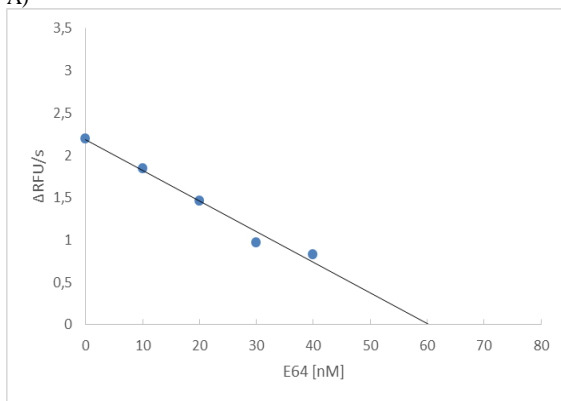

cathepsin concentration: 61 nM

B)

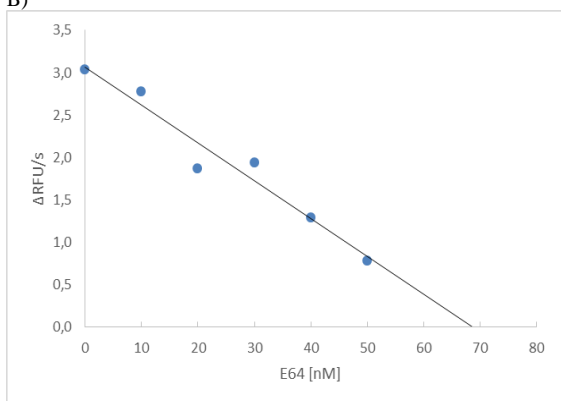

cathepsin concentration: 68 nM

C)

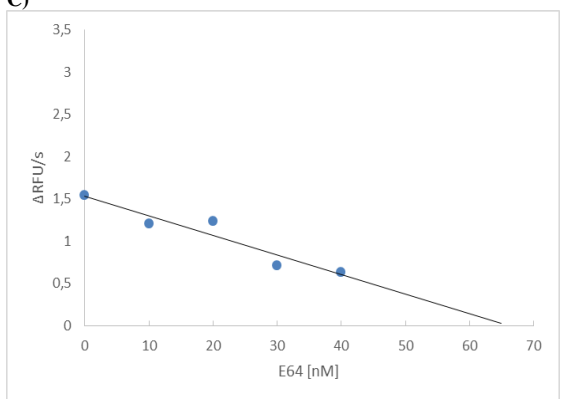

cathepsin concentration: 66 nM

### Supplemental Figure S3. Active site titration of cathepsins in the macrophage secretome

Active site titration was used to determine the concentration of active cathepsins in the macrophage secretome. Secretome samples were incubated in the presence of increasing concentrations of E-64 (0-50 nM) and residual cathepsin activity was measured using the fluorogenic substrate Z-FR-AMC. Cathepsin concentrations were determined using linear regression analysis. Results of three biological replicates are shown (A, B and C) and the three determined cathepsin concentrations are listed. The average cathepsin concentration, calculated from the three experiments was  $65 \pm 4$  nM.

## Supplemental Figure S4

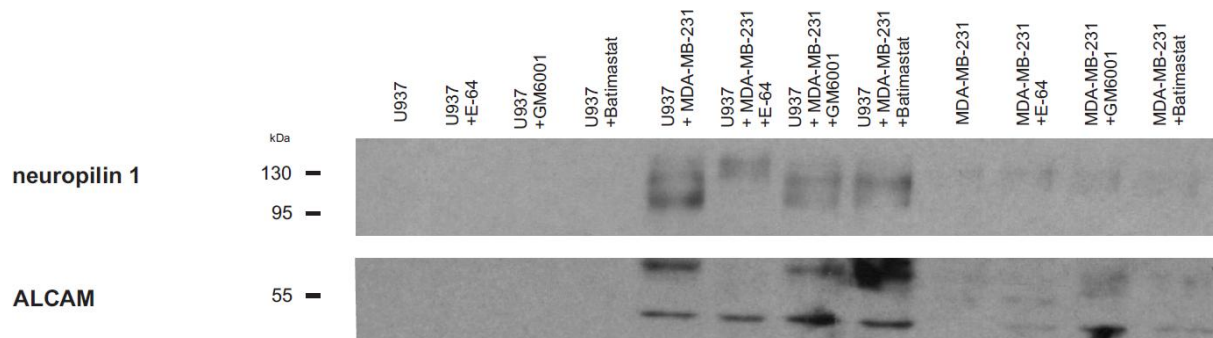

### Supplemental Figure S4. Metalloprotease inhibitors GM6001 and batimastat do not prevent substrate shedding in the co-culture of U937 cells differentiated into macrophages and MDA-MB-231 cells as cancer cells.

Immunoblot analysis of shedding of ALCAM and neuropilin 1 in the culture media. U937 cells were differentiated into macrophages and co-cultured with MDA-MB-231 cells. No shedding was detected in individual cell lines or in inhibitor-treated cells. Only the use of cysteine inhibitor E-64 abolished substrate shedding in co-culture while the broad-spectrum metalloprotease inhibitors GM6001 and batimastat had no effect.



## Supplemental Figure S5

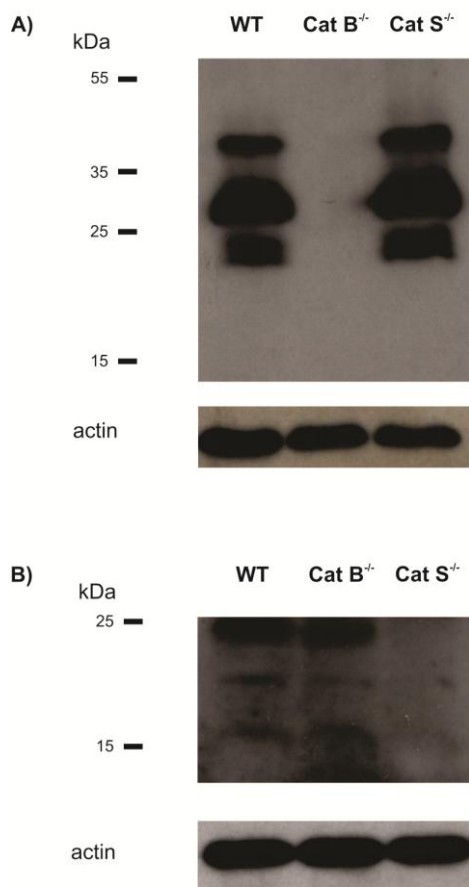

### Supplemental Figure S5. Detection of cathepsins B and S in RIP1-Tag2 tumors.

Immunological detection of cathepsin B (A) and cathepsin S (B) in tumor extracts was used to confirm their genetic ablation in catB<sup>-/-</sup> and catS<sup>-/-</sup> RIP1Tag2 tumors. Actin was used as a loading control.

## Supplemental Figure S6

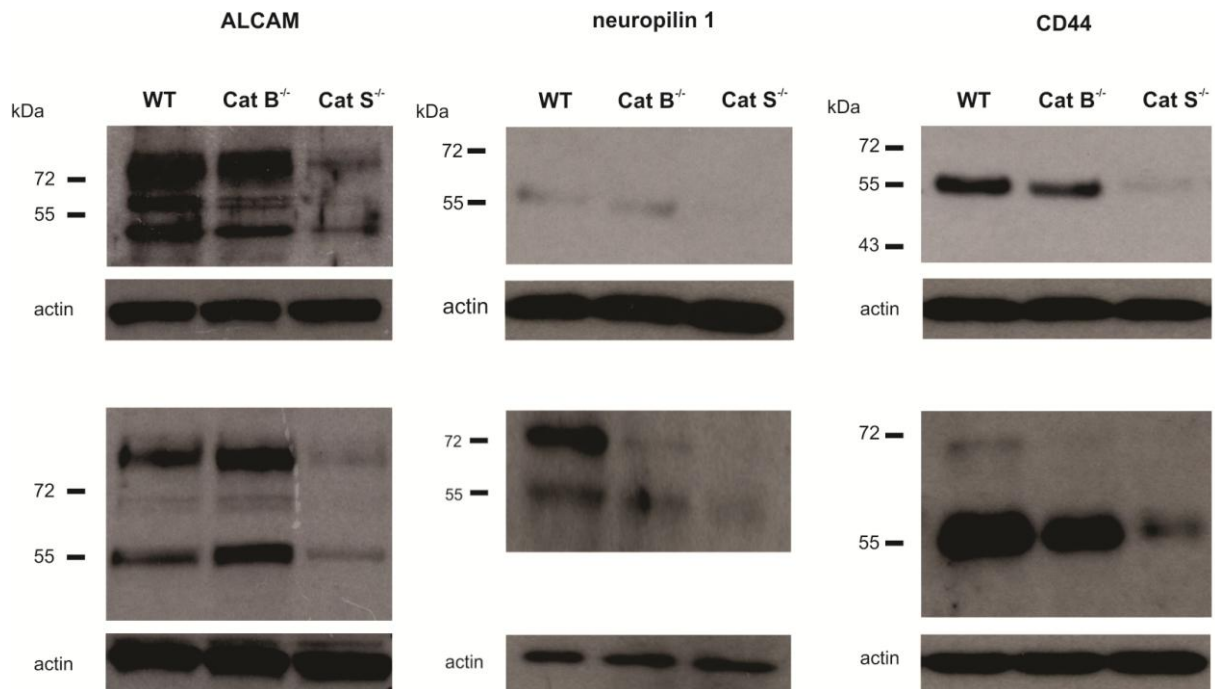

### Supplemental Figure S6. Processing of ALCAM, neuropilin 1 and CD44 in soluble RIP1-Tag2 tumor extracts.

Immunological detection of processed ALCAM, neuropilin 1 and CD44 in soluble extracts from six additional tumors is shown, in addition to the experiment shown in Figure 4d. In the last replicate (lower panels), tumor samples were prepared in the presence of 20  $\mu$ M E-64 in the homogenization buffer. Actin was used as a loading control. In both replicates, substrate processing was almost completely abolished in the absence of cathepsin S, while the absence of cathepsin B showed much lesser effect.

**Supplemental Table S1**

| protein name                               | protein ID  | gene name | number of identified peptides | SCR (cathepsin L) |       |      | SCR (cathepsin S) |     |      | SCR (cathepsin B) |     |
|--------------------------------------------|-------------|-----------|-------------------------------|-------------------|-------|------|-------------------|-----|------|-------------------|-----|
|                                            |             |           |                               |                   |       |      |                   |     |      |                   |     |
| activated leukocyte cell adhesion molecule | IPI00015102 | ALCAM     | 16                            | 18                | 4.4   | 10   | 3.3               | 4.2 | 6.6  | -                 | -   |
| alkaline phosphodiesterase 1               | IPI00184311 | ENPP1     | 14                            | 11.5              | 15    | 39   | 4.6               | 4.5 | 24   | -                 | -   |
| CD44 antigen                               | IPI00305064 | CD44      | 3                             | 15                | 4.4   | 4.2  | 5.25              | 20  | 26   | -                 | -   |
| cell surface glycoprotein MUC18            | IPI00016334 | MCAM      | 5                             | 7                 | -     | 10   | 12                | 8   | 6    | -                 | -   |
| decay-accelerating factor CD55             | IPI00382926 | DAF       | 12                            | 20                | 15    | 59   | 12                | 11  | 14   | -                 | -   |
| epidermal growth factor receptor           | IPI00018274 | EGFR      | 8                             | 14                | 10    | 26   | 16                | 5   | -    | -                 | -   |
| ephrin type A receptor 2                   | IPI00021267 | EPHA2     | 6                             | 25                | 41    | 53   | 5                 | 35  | 15   | -                 | -   |
| L1 cell adhesion molecule                  | IPI01013306 | CAML1     | 20                            | 14                | 2     | 28.3 | 14                | 1   | 10.5 | -                 | -   |
| nectin-like protein 5                      | IPI00299158 | PVR       | 2                             | -                 | 7     | 11   | 3.5               | 13  | 6    | -                 | -   |
| neuropilin 1                               | IPI00299594 | NRP1      | 16                            | 30                | 12.75 | 15.8 | 23                | 6   | 6.8  | 4.6               | 7.5 |
| plexin A1                                  | IPI00552671 | PLXNA1    | 9                             | 14                | 12    | 23   | 8                 | 6   | 8    | -                 | -   |
| plexin B2                                  | IPI00853369 | PLXNB1    | 11                            | 15                | 23    | 22   | 12                | 27  | 6    | -                 | -   |
| transferrin receptor protein 1             | IPI00022462 | TFRC      | 25                            | 8                 | 2     | 8.5  | 9                 | 5.6 | 12.3 | -                 | -   |

**Supplemental Table S1. Spectral count ratio (SCR) values of identified substrate candidates in cathepsin treated MDA-MB-231 cells.**

A group of 13 identified substrate candidates is listed with their peptide ID, gene name and the total number of peptides identified. For all identified substrate candidates an SCR ratio of all biological replicates is shown. Experiments with cathepsins L and S were done in three biological replicates, while the experiment with cathepsin B was performed in two biological replicates, with only one substrate candidate (neuropilin 1) identified after cathepsin B treatment. The SCR ratios were reproducibly  $>3.0$  for the majority of identified substrates, showing that they were released from the cell surface with high reproducibility. Epidermal growth factor receptor, MUC18 and nectin-like protein 5 were not identified in one biological replicate, while L1CAM and transferrin receptor protein 1 had SCR values  $<3.0$  in one (transferrin receptor protein 1) or two (L1CAM) out of six biological replicates.

## Supplemental Table S2

### PANCI

| <b>protein name</b>               | <b>protein IDs</b> | <b>gene name</b> | <b>peptides (catL)</b> | <b>peptides (catS)</b> | <b>SCR (catL)</b> | <b>SCR (catS)</b> |
|-----------------------------------|--------------------|------------------|------------------------|------------------------|-------------------|-------------------|
| alkaline phosphatase              | IPI00007289        | ALPP             | 2                      | 2                      | 4                 | 4                 |
| intercellular adhesion molecule 1 | IPI00008494        | ICAM1            | 5                      | 2                      | 5                 | 4                 |
| ephrin type A receptor 2          | IPI00021267        | EPHA2            | 6                      | 2                      | 4                 | 13                |
| perlecan                          | IPI00024284        | HSPG2            | 4                      | 19                     | 6                 | 21.5              |
| nidogen 1                         | IPI00026944        | NID1             | 3                      | 15                     | 6                 | 18.5              |
| CD109 antigen                     | IPI00152540        | CD109            | 31                     | 8                      | 6.5               | 5                 |
| ephrin type B receptor 4          | IPI00289342        | EPHB4            | 3                      | 2                      | 5                 | 6                 |
| leucyl-cystinyl aminopeptidase    | IPI00307017        | LNPEP            | 6                      | 3                      | 5                 | 7                 |
| agrin                             | IPI00374563        | AGRN             | 2                      | 4                      | 4                 | 7                 |
| laminin subunit alpha 5           | IPI00783665        | LAMA5            | 13                     | 56                     | 10                | 85                |
| plexin B2                         | IPI00853369        | PLXNB2           | 4                      | 3                      | 5                 | 8                 |

**HT144**

| <b>protein name</b>                                   | <b>protein IDs</b> | <b>gene name</b> | <b>peptides (catL)</b> | <b>peptides (catS)</b> | <b>SCR (catL)</b> | <b>SCR (catS)</b> |
|-------------------------------------------------------|--------------------|------------------|------------------------|------------------------|-------------------|-------------------|
| 4F2 cell-surface antigen heavy chain                  | IPI00554481        | SLC3A2           | 5                      | 3                      | 8                 | 5.7               |
| activated leukocyte cell adhesion molecule            | IPI00015102        | ALCAM            | 4                      | 2                      | 10                | 4                 |
| CD44 antigen                                          | IPI00305064        | CD44             | 1                      | 2                      | 127               | 191               |
| cell surface glycoprotein MUC18                       | IPI00016334        | MCAM             | 6                      | 6                      | 5.25              | 28                |
| discoidin, CUB and LCCL domain-containing protein 2   | IPI00433138        | DCBLD2           | 3                      | 3                      | 6                 | 8                 |
| EMILIN1                                               | IPI00013079        | EMILIN1          | 8                      | 7                      | 7                 | 7                 |
| endoglin                                              | IPI00017567        | ENG              | 3                      | 4                      | 11                | 14                |
| ephrin type B receptor 4                              | IPI00289342        | EPHB4            | 3                      | 5                      | 7                 | 6                 |
| melanotransferrin                                     | IPI00029275        | MFI2             | 14                     | 10                     | 23.7              | 41                |
| neural cell adhesion molecule L1-like protein         | IPI00299059        | CHL1             | 2                      | 4                      | 3.3               | 19                |
| neuronal cell adhesion molecule                       | IPI00873446        | NRCAM            | 8                      | 9                      | 5.5               | 27                |
| neuropilin 2                                          | IPI00029693        | NRP2             | 7                      | 7                      | 18                | 14                |
| perlecan                                              | IPI00024284        | HSPG2            | 27                     | 37                     | 8.25              | 55.5              |
| plexin B2                                             | IPI00853369        | PLXNB2           | 10                     | 9                      | 28                | 23                |
| receptor-type tyrosine-protein phosphatase F          | IPI00107831        | PTPRF            | 13                     | 17                     | 23                | 67                |
| roundabout homolog 1                                  | IPI00740934        | ROBO1            | 4                      | 7                      | 5                 | 7.5               |
| tenascin                                              | IPI00031008        | TNC              | 13                     | 12                     | 23                | 45                |
| teneurin 3                                            | IPI00398020        | TNM3             | 10                     | 6                      | 12                | 12                |
| transferrin receptor protein 1                        | IPI00022462        | TFRC             | 3                      | 2                      | 12                | 7                 |
| transforming growth factor-beta-induced protein ig-h3 | IPI00018219        | TGFBI            | 3                      | 3                      | 11                | 5                 |

**T98-G**

| <b>protein name</b>                              | <b>protein ID</b> | <b>gene name</b> | <b>peptides (catL)</b> | <b>peptides (catS)</b> | <b>SCR (catL)</b> | <b>SCR (catS)</b> |
|--------------------------------------------------|-------------------|------------------|------------------------|------------------------|-------------------|-------------------|
| 4F2 cell-surface antigen heavy chain             | IPI00554481       | SLC3A2           | 10                     | 8                      | 6.1               | 4.6               |
| activated leukocyte cell adhesion molecule       | IPI00015102       | ALCAM            | 2                      | 1                      | 6                 | -                 |
| collagen alpha-1(XII) chain                      | IPI00329573       | COL12A1          | 8                      | 11                     | 12                | 7                 |
| C-type mannose receptor 2                        | IPI00005707       | CLEC13E          | 10                     | 12                     | 4.2               | 6.75              |
| ephrin type A receptor 2                         | IPI00021267       | EPHA2            | 2                      | 2                      | 5                 | 5                 |
| fibronectin                                      | IPI00855785       | FN1              | 32                     | 45                     | 7.2               | 3.6               |
| galectin-3-binding protein                       | IPI00023673       | LGALS3BP         | 11                     | 8                      | 4.2               | 14                |
| laminin subunit alpha 4                          | IPI00329482       | LAMA4            | 10                     | 7                      | 5                 | 15                |
| neuropilin 1                                     | IPI00299594       | NRP1             | 10                     | 6                      | 27                | 12                |
| perlecan                                         | IPI00024284       | HSPG2            | 30                     | 31                     | 69                | 68                |
| plexin B2                                        | IPI00853369       | PLXNB2           | 12                     | 7                      | 11                | 8.5               |
| receptor-type tyrosine-protein phosphatase F     | IPI00107831       | PTPRF            | 7                      | 6                      | 7.5               | 13                |
| receptor-type tyrosine-protein phosphatase gamma | IPI00011651       | PTPRG            | 3                      | 3                      | 9                 | 14                |
| sodium bicarbonate cotransporter 3               | IPI00926820       | SLC4A7           | 3                      | 3                      | 11                | 7                 |
| transferrin receptor protein 1                   | IPI00022462       | TFRC             | 7                      | 6                      | 4.75              | 4.75              |
| vasorin                                          | IPI00395488       | VASN             | 10                     | 9                      | 27                | 40                |

## MCF-7

| protein name                                  | protein ID  | gene name | peptides (catL) | peptides (catS) | SCR (catL) | SCR (cat S) |
|-----------------------------------------------|-------------|-----------|-----------------|-----------------|------------|-------------|
| activated leukocyte cell adhesion molecule    | IPI00015102 | ALCAM     | 4               | 2               | 14         | 8           |
| cadherin EGF LAG seven-pass G-type receptor 2 | IPI00015346 | CELSR2    | 11              | 12              | 23         | 27          |
| ephrin type-B receptor 4                      | IPI00289342 | EPHB4     | 4               | 3               | 10         | 7           |
| FRAS1-related extracellular matrix protein 2  | IPI00180707 | FREM2     | 2               | 4               | 5          | 6           |
| galectin-3-binding protein                    | IPI00023673 | LGALS3BP  | 3               | 2               | 10         | 6           |
| L1 cell adhesion molecule                     | IPI01013306 | CAML1     | 7               | 6               | 13         | 14          |
| neuronal cell adhesion molecule               | IPI00873446 | NRCAM     | 2               | 6               | 6          | 6.5         |
| plexin B2                                     | IPI00853369 | PLXNB2    | 2               | 0               | 4          | -           |
| receptor-type tyrosine-protein phosphatase F  | IPI00107831 | PTPRF     | 13              | 12              | 27         | 23          |

### **Supplemental Table S2. Lists of cell surface proteins identified in the supernatant after cathepsin treatment of cell lines PANC1, HT144, T98-G and MCF-7.**

Proteins released from the cell surface and identified in the supernatants of four tested cell lines treated with cathepsins L and S are listed. For each cathepsin treatment, the number of identified peptides and the corresponding spectral count ratio between treated sample and negative control are provided.
